# Supplementary material for: Cluster-induced desorption/ionization mass spectrometry of highlighter ink: unambiguous identification of dyes and degradation processes based on fragmentation-free desorption
Source: Royal Society of Chemistry journal article supplement (doi:10.1039/d1an01588e), 2021-12-13
Supplement: d1an01588e1.pdf [file d1an01588e1.pdf]

Supporting Information for:

**Cluster-induced desorption/ionization mass spectrometry of highlighter ink: unambiguous identification of dyes and degradation processes based on fragmentation-free desorption**

K. Bomhardt<sup>a</sup>, P. Schneider<sup>a</sup>, M. Rohnke<sup>b</sup>, C. Gebhardt<sup>c</sup> and M. Dürr<sup>a,\*</sup>

<sup>a</sup>*Institut für Angewandte Physik and Zentrum für Materialforschung, Justus-Liebig-Universität Giessen, Heinrich-Buff-Ring 16, D-35392 Giessen, Germany*

<sup>b</sup>*Physikalisch-Chemisches Institut and Zentrum für Materialforschung, Justus-Liebig-Universität Giessen, Heinrich-Buff-Ring 17, D-35392 Giessen, Germany*

<sup>c</sup>*Bruker Daltonik GmbH, Fahrenheitstr. 4, D-28359 Bremen, Germany*

\* *Corresponding author: michael.duerr@ap.physik.uni-giessen.de*

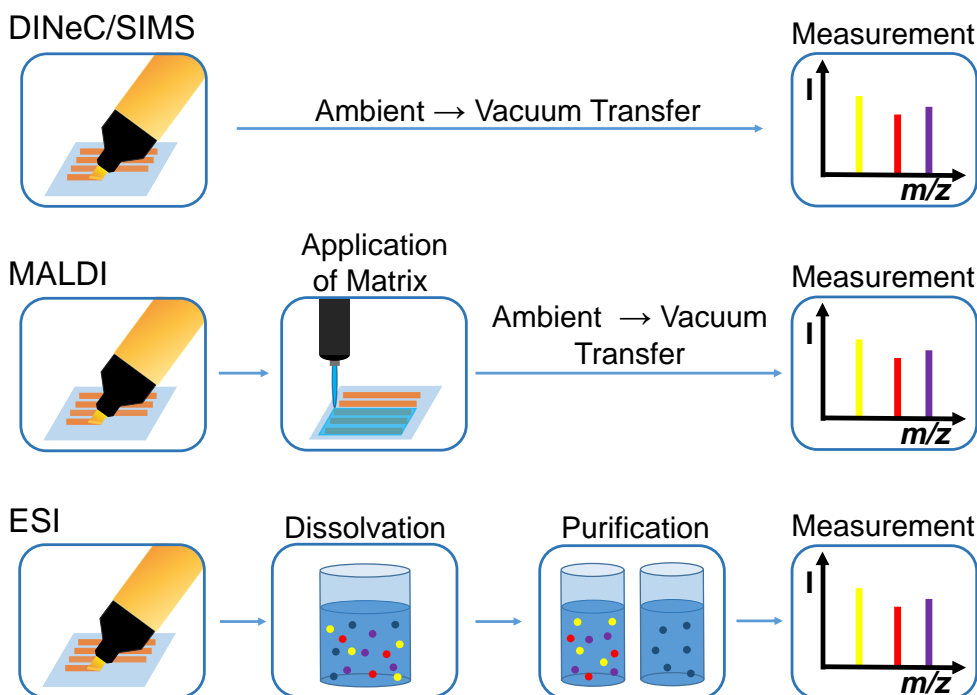

Figure S1: Schematic illustration of the workflow required for different ionization methods when applied for the investigation of inks written on paper substrates.

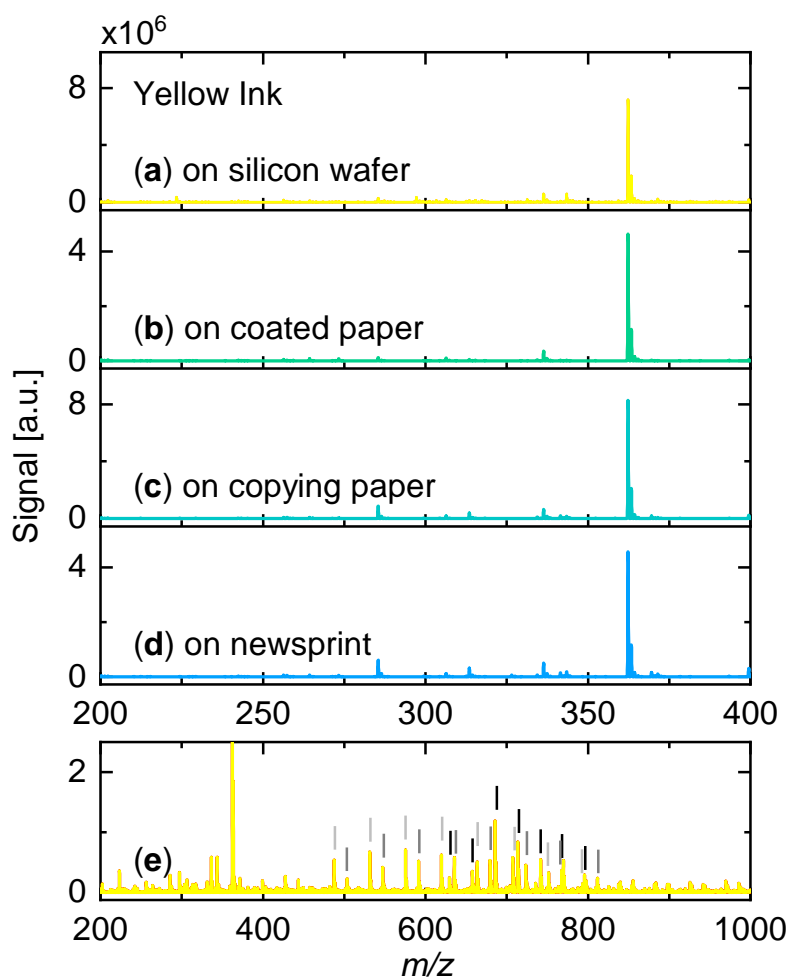

Figure S2: Positive ion mode DINEC mass spectra obtained from samples with yellow highlighter drawn on different substrates: (a) silicon wafer, (b) coated paper, (c) copying paper, and (d) newsprint. (e) shows the spectrum of (a) in an extended mass range. In addition to the peak associated with the yellow dye, three peak progressions with the peaks separated by  $\Delta(m/z) = 44$  (indicated by light and dark grey lines) and  $\Delta(m/z) = 28$  (black lines) are observed, which are assigned to polymer matrix in the highlighter ink.

Table S1: Ion peaks observed in the spectra shown in Figure 2 obtained by means of DINEC-MS

| $m/z$ | Intensity [a.u.] |         |         |         |         |
|-------|------------------|---------|---------|---------|---------|
|       | (a)              | (b)     | (c)     | (d)     | (e)     |
| 471.4 | 35401            | 1170803 | 1192156 | 2198989 | 2518462 |
| 429.4 | 34588            | 688925  | 1303573 | 2105223 | 454977  |
| 362.3 | 7178677          | 3773461 | 494993  | 21871   | 7489    |

Table S2: Relative peak intensities of peaks associated with the three dye molecules of the highlighter inks investigated by means of DINEC-MS.

| <b>Color</b>      | <b>Substrate</b> | <b>BY40</b>       | <b>BR1:1</b>       | <b>BV11</b>       |
|-------------------|------------------|-------------------|--------------------|-------------------|
| Yellow            | Si               | 100               | 0                  | 0                 |
|                   | paper            | 100               | 0                  | 0                 |
| Red               | Si               | 17                | 43                 | 40                |
|                   | paper            | 11                | 43                 | 46                |
| Purple            | Si               | 0                 | 15                 | 85                |
|                   | paper            | 0                 | 10                 | 90                |
| Orange            | Si               | 68                | 12                 | 20                |
|                   | Si               | 65                | 14                 | 21                |
|                   | Si               | 78                | 11                 | 11                |
|                   | Si               | 68                | 13                 | 19                |
|                   | Si               | 76                | 10                 | 14                |
|                   | paper<br>average | 72<br><b>71±4</b> | 11<br><b>12 ±1</b> | 17<br><b>17±3</b> |
| Pink              | Si               | 0                 | 49                 | 51                |
|                   | Si               | 0                 | 52                 | 48                |
|                   | Si               | 0                 | 62                 | 38                |
|                   | Si               | 0                 | 59                 | 41                |
|                   | Si               | 0                 | 56                 | 44                |
|                   | paper<br>average | 0<br><b>0 ±0</b>  | 52<br><b>55 ±5</b> | 48<br><b>45±4</b> |
| Mix Orange + Pink | Si               | 47                | 29                 | 24                |
|                   | Si               | 27                | 37                 | 36                |
|                   | Si               | 32                | 35                 | 33                |
|                   | Si               | 53                | 26                 | 21                |
|                   | average          | <b>40 ±11</b>     | <b>32 ±4</b>       | <b>29±6</b>       |

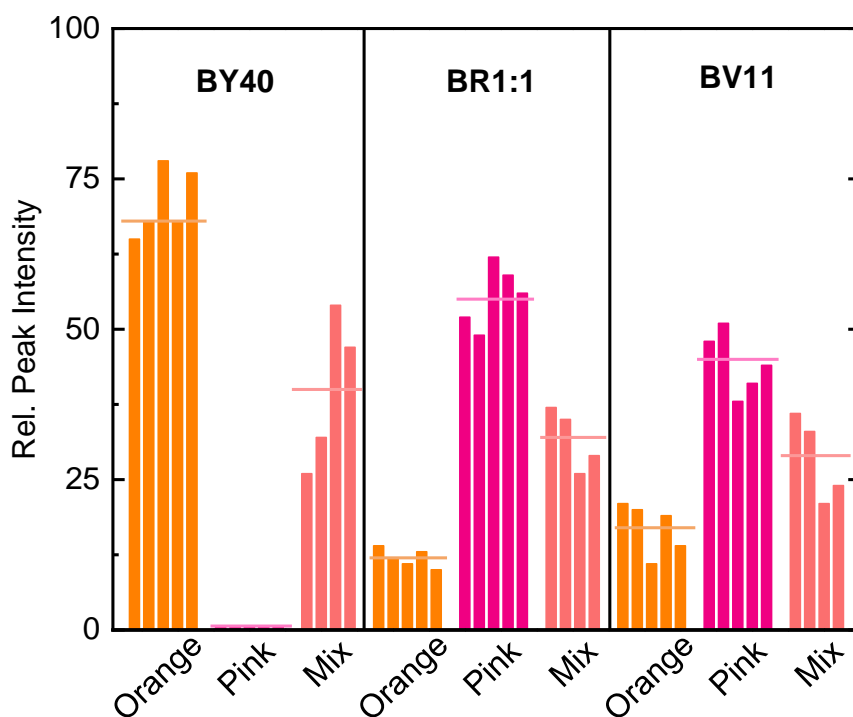

Figure S3: Relative peak intensity of the peaks associated with the three dyes Basic Yellow 40, Basic Red 1:1, and Basic Violet 11 as observed in DINEC-MS for the orange and pink highlighter inks as well as for a mixture of orange and pink highlighter ink (ratio approx. 1:1). The values of the pure inks scatter slightly around the mean value (compare also Tab. S2); the distribution for the pure inks and the mixture are clearly separated.

Table S3: Ion peaks observed in the spectra shown in Figure 4 obtained by means of DINEC-MS

| $m/z$ | Intensity [a.u.] |
|-------|------------------|
| 429.3 | 115943           |
| 414.3 | 20460            |
| 401.3 | 12682            |
| 399.4 | 21832            |
| 365.3 | 15223            |
| 355.3 | 32017            |
| 341.3 | 67041            |
| 327.3 | 220820           |

Table S4: Ion peaks observed in the spectra shown in Figure 5 obtained by means of DINEC-MS

| $m/z$ | Intensity [a.u.] |       |
|-------|------------------|-------|
|       | (a)              | (b)   |
| 362.3 | 30399            | 80392 |
| 347.3 | 2377             | 3867  |
| 332.3 | 10306            | 8030  |
| 318.3 | 86282            | 40389 |

Table S5: Ion peaks observed in the spectra shown in Figure 6 obtained by means of DINEC-MS

| $m/z$ | Intensity [a.u.] |         |
|-------|------------------|---------|
|       | (a)-(d)          | (e)-(h) |
| 471.4 | 366334           | 6841730 |
| 443.3 | 393313           | 5834746 |
| 399.3 | 377406           | 3045115 |
| 355.3 | 315823           | 1054573 |

Table S6: Ion peaks observed in the spectra shown in Figure 7 obtained by means of DINEC-MS

| $m/z$ | Intensity [a.u.] |                 |         |
|-------|------------------|-----------------|---------|
|       | (a)              | (b) (inset)     | (c)     |
| 376.3 | 64801            | 52294 (8953)    | 1670345 |
| 362.3 | 28684768         | 6149794 (64273) | 1316430 |
| 348.3 | 50053            | 71441 (8110)    | 1085953 |
| 334.3 | 172624           | 669177 (44314)  | 861559  |
| 306.3 |                  | Contamination   |         |
| 264.4 | 112327           | 69156 (37615)   | 70667   |
| 256.3 | 161211           | 91489 (56581)   | 83525   |
| 242.4 | 64613            | 20702 (22030)   | 32460   |
| 224.4 | 52082            | 28886 (20023)   | 27829   |
| 200.3 | 241682           | 96139 (36716)   | 136424  |
| 182.3 | 166165           | 54502 (66079)   | 82115   |
| 170.3 | 248930           | 187977 (70029)  | 169699  |
| 161.3 | 2624             | 11973 (6739)    | 1007542 |
| 155.3 |                  | Contamination   |         |
| 147.3 | 14421            | 137040 (156510) | 2628727 |

Table S7: Ion peaks observed in the spectra shown in Figure 8 obtained by means of DINEC-MS

| $m/z$ | Intensity [a.u.] |                   |         |
|-------|------------------|-------------------|---------|
|       | (a)              | (b) (inset)       | (c)     |
| 485.4 | 337919           | 236890 (17636)    | 203644  |
| 471.4 | 41780428         | 11294170 (312748) | 2136593 |
| 457.4 | 1519330          | 251161 (24148)    | 607563  |
| 443.4 | 2317717          | 6093131 (235756)  | 646205  |
| 429.3 | 45260            | 24662 (9527)      | 547898  |
| 415.3 | 173562           | 282014 (112150)   | 383407  |
| 401.3 | 8838             | 5498 (2418)       | 699801  |
| 387.3 | 14077            | 14498 (24115)     | 538323  |
| 359.3 | 4970             | 2548 (4398)       | 854511  |

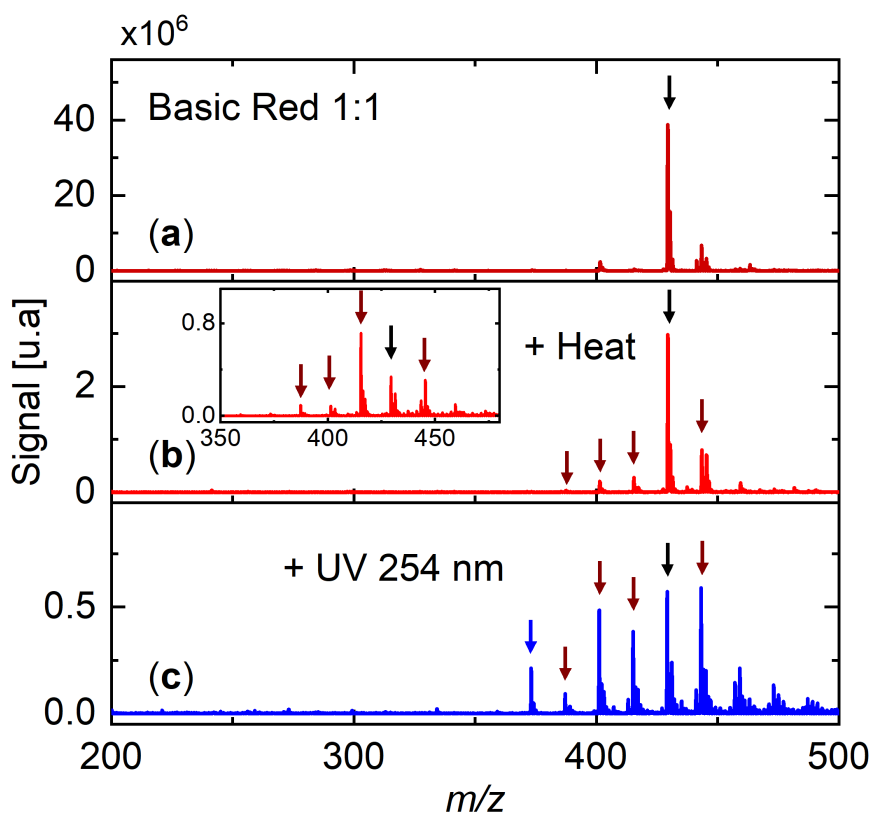

Figure S4: (a) DIneC mass spectrum in positive ion mode of the dye Basic Red 1:1. The black arrow indicates the peak at  $m/z = 429$  associated with intact cation of the dye. (b) The mass spectrum obtained from the heated dye sample shows three fragment peaks indicated by brown arrows. An additional peak at  $m/z = 443$ , i.e., at higher  $m/z$  values when compared to the intact dye molecule, is also observed and labelled. It is attributed to a dye molecule carrying an additional methyl group, similar as observed for the Basic Yellow 40 sample after UV-light-induced decomposition (Fig. 7(c)). Further decomposition with higher thermal load (intensity of the main peak reduced to less than 2 % of the initial value) does not lead to further prominent fragment peaks. (c) Mass spectrum taken after UV-light induced decomposition of the red dye. An additional fragment peak is observed (labeled by a blue arrow).

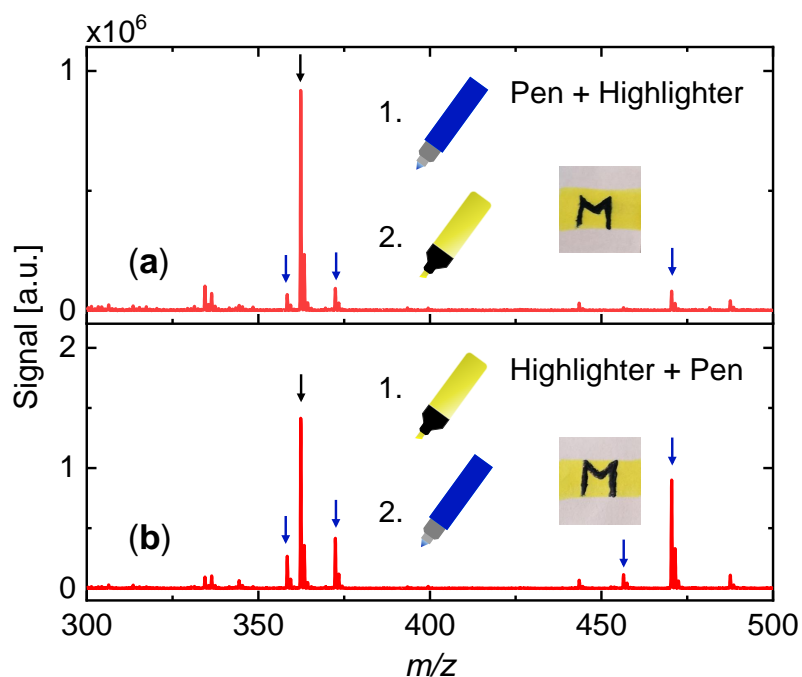

Figure S5: Positive ion mode DINEC mass spectra of **(a)** highlighter ink drawn on pen ink on a paper substrate and **(b)** strokes of pen ink drawn on the highlighter ink. Insets: Photographs of the respective samples. Black arrows indicate the peak assigned to Basic Yellow 40 from the yellow highlighter ink, blue arrows indicate the peaks assigned to the dyes used in the pen ink. If the highlighter is applied after the pen ink **(a)**, the intensity of the fluorescent dye shows highest signal intensity. When the order of application is reversed **(b)**, the intensity of the peaks associated with the pen ink increase in intensity. The relative intensity of the peaks is given by the intensity as measured for the pure and the completely covered ink/highlighter and highlighter/ink systems (Fig. 9) weighted by the relative area covered by the differently colored parts of the sample.



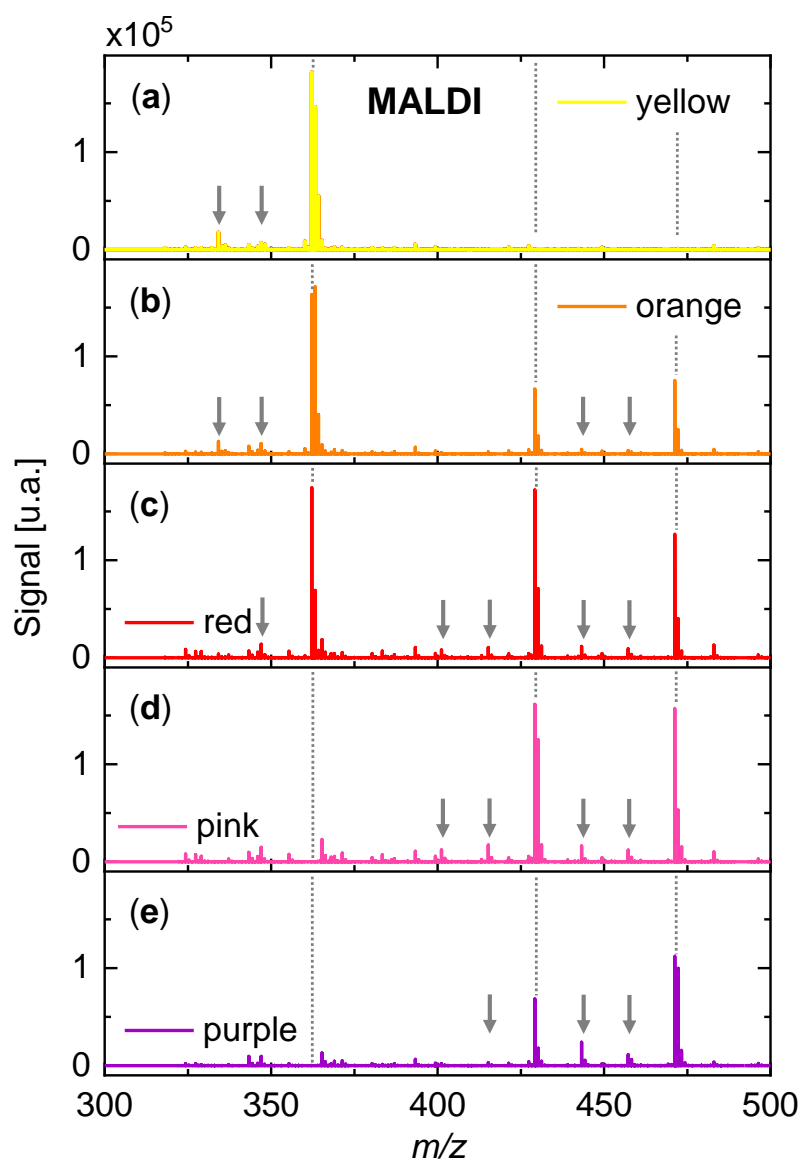

Figure S6: Positive ion mode MALDI mass spectra from (a) yellow, (b) orange, (c) red, (d) pink, and (e) purple colored highlighter ink applied to paper substrates. Three major peaks which are assigned to the dye molecules are observed at  $m/z = 362$ ,  $m/z = 429$ , and  $m/z = 471$  in most of the spectra but with varying relative intensity. Arrows indicate fragmentation peaks at  $m/z = 334$  and  $m/z = 348$  (yellow dye),  $m/z = 401$  and  $m/z = 415$  (red dye), and  $m/z = 443$  and  $m/z = 457$  (violet dye), which are also observed in DINEC spectra measured after dye degradation. The measurements were performed on a Bruker timsTOF fleX time-of-flight apparatus; 2,5-dihydroxybenzoic acid (DHB) was used as matrix. DHB was dissolved in an acetonitrile/water (90:10) mixture and sprayed (nozzle temperature 60 °C) onto the highlighter ink written on copying paper.

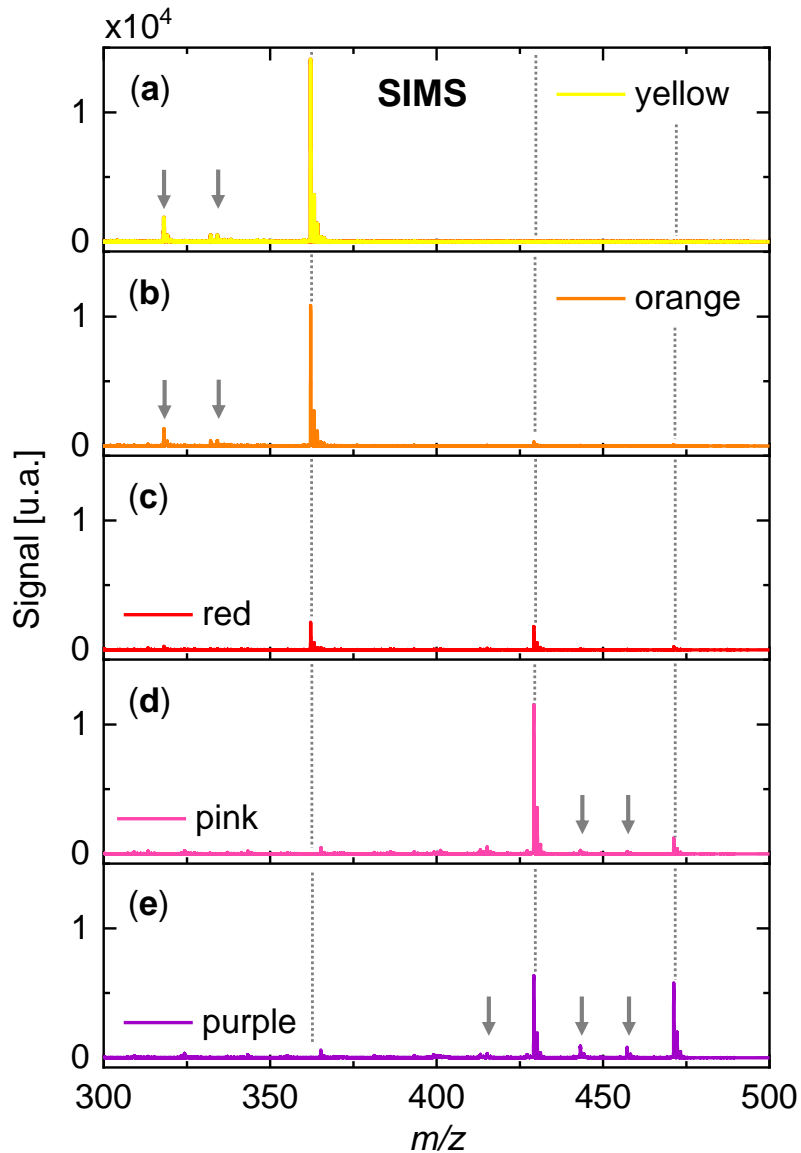

Figure S7: Positive ion mode SIMS mass spectra from (a) yellow, (b) orange, (c) red, (d) pink, and (e) purple colored highlighter ink applied to Si substrates. Three major peaks which are assigned to the dye molecules are observed at  $m/z = 362$ ,  $m/z = 429$ , and  $m/z = 471$  in most of the spectra but with varying relative intensity. Arrows indicate fragmentation peaks at  $m/z = 318$  and  $m/z = 334$  (yellow dye),  $m/z = 415$  (red dye), and  $m/z = 443$  and  $m/z = 457$  (violet dye), which are also observed in DINEC spectra measured after dye degradation. The measurements were performed with a M6 Hybrid SIMS instrument (IONTOF GmbH, Münster, Germany). As primary ions, 20 keV  $\text{Ar}_{1500}^+$ -clusters were used at a cycle time of 150  $\mu\text{s}$  resulting in a primary ion current of  $I = 0.07$  pA. The ion beam was rasterized with  $128 \times 128$  pixels on an area of  $100 \times 100 \mu\text{m}^2$ . Total ion dose was  $10^{12}$  ions/ $\text{cm}^2$  for all measurements. The obtained mass resolution (FWHM) at  $m/z = 362.2$  was  $m/\Delta m > 3.500$  for all spectra.

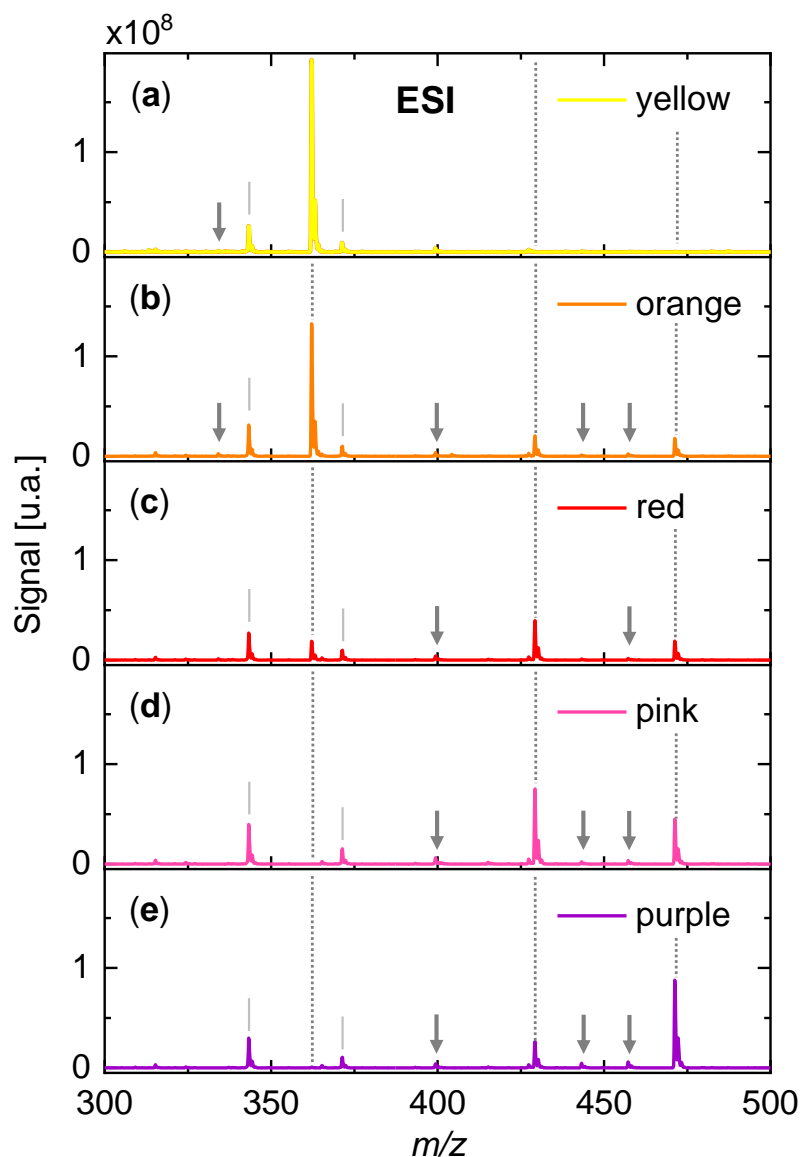

Figure S8: Positive ion mode ESI mass spectra from (a) yellow, (b) orange, (c) red, (d) pink, and (e) purple colored highlighter ink. For the measurements, which were performed on a Bruker amaZon speed mass spectrometer (Bruker Daltonik GmbH, Bremen, Germany), a dot of ink was dissolved in a mixture of acetonitrile/water (50:50) containing 0.1 Vol% formic acid. Three major peaks which are assigned to the dye molecules are observed at  $m/z = 362$ ,  $m/z = 429$ , and  $m/z = 471$  in most of the spectra but with varying relative intensity. Arrows indicate fragment peaks at  $m/z = 334$  (yellow dye),  $m/z = 399$  (red dye), and  $m/z = 443$  and  $m/z = 457$  (violet dye), which are also observed in DINEC mass spectra measured after dye degradation. Gray lines indicate additional peaks which are not attributed to dye fragments, they are also observed in DINEC mass spectra of the highlighter inks. They are tentatively assigned to additional compounds of the highlighter ink (Fig. 2, Tab. S1).
